# Supplementary material for: Human Milk Oligosaccharides Are Present in Amniotic Fluid and Show Specific Patterns Dependent on Gestational Age
Source: MDPI journal article supplement (doi:10.3390/nu14102065), 2022-05-14
Supplement: s1 [file s1]

## **Supplementary information**

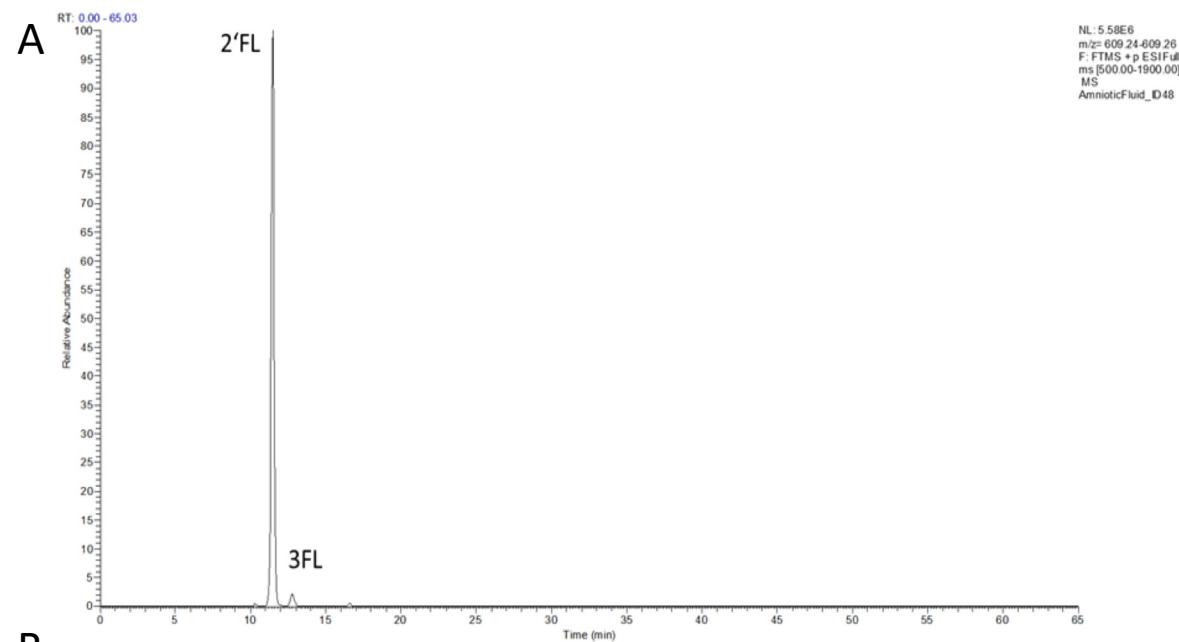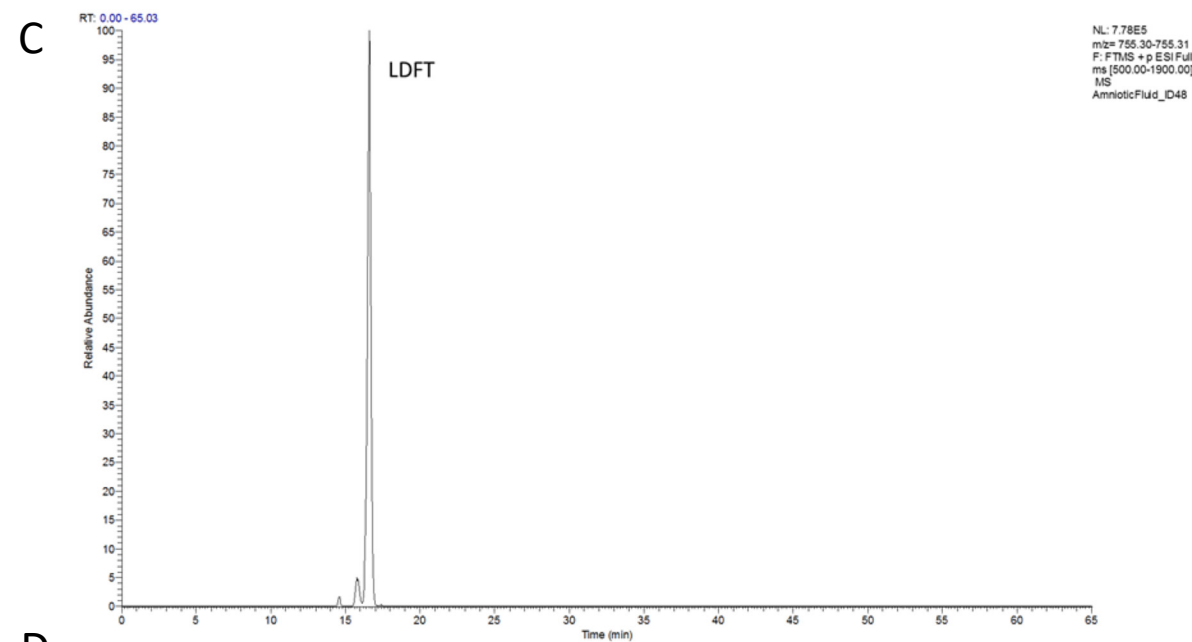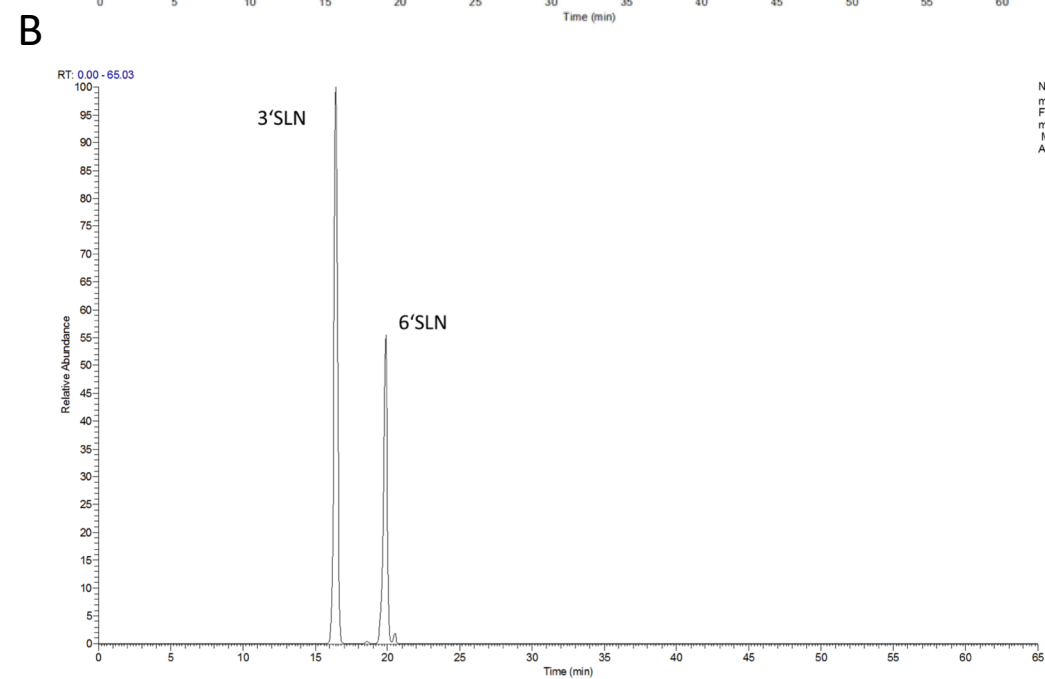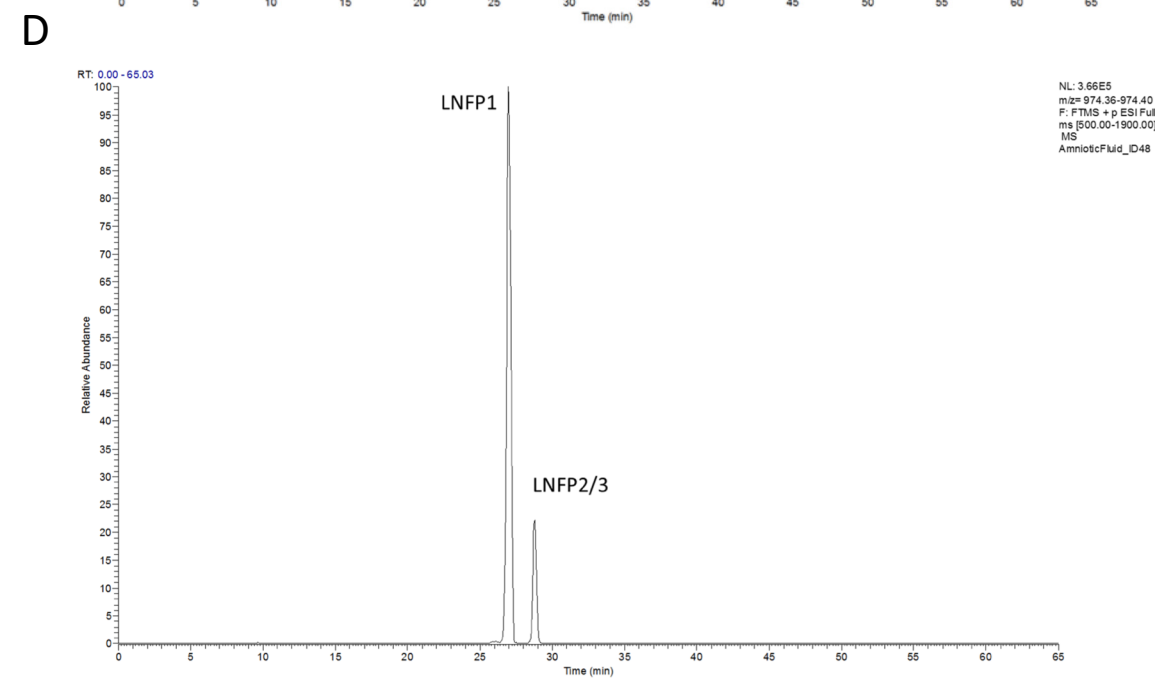

**Supplementary Figure S1.** Confirmation of human milk oligosaccharide (HMOs) identity by mass spectrometry.

Representative mass chromatograms of oligosaccharides isolated from amniotic fluid sample (36 wk of gestation) acquired by LC-MS/MS in multiple reaction monitoring mode are shown. Panels show the mass transitions 609/301 for 2-fucosyllactose (2'FL) and 3- fucosyllactose (3FL) (A), 795/325 for 3'-sialyllactosamine (3'-SLN) and 6'-sialyllactosamine (6'-SLN) (B), 755/301 for Lactodifucotetraose (LDFT) (C), 974/301 for lacto-N-fucopentaose 1 (LNFP1) and LNFP2/3 (D).

**A**

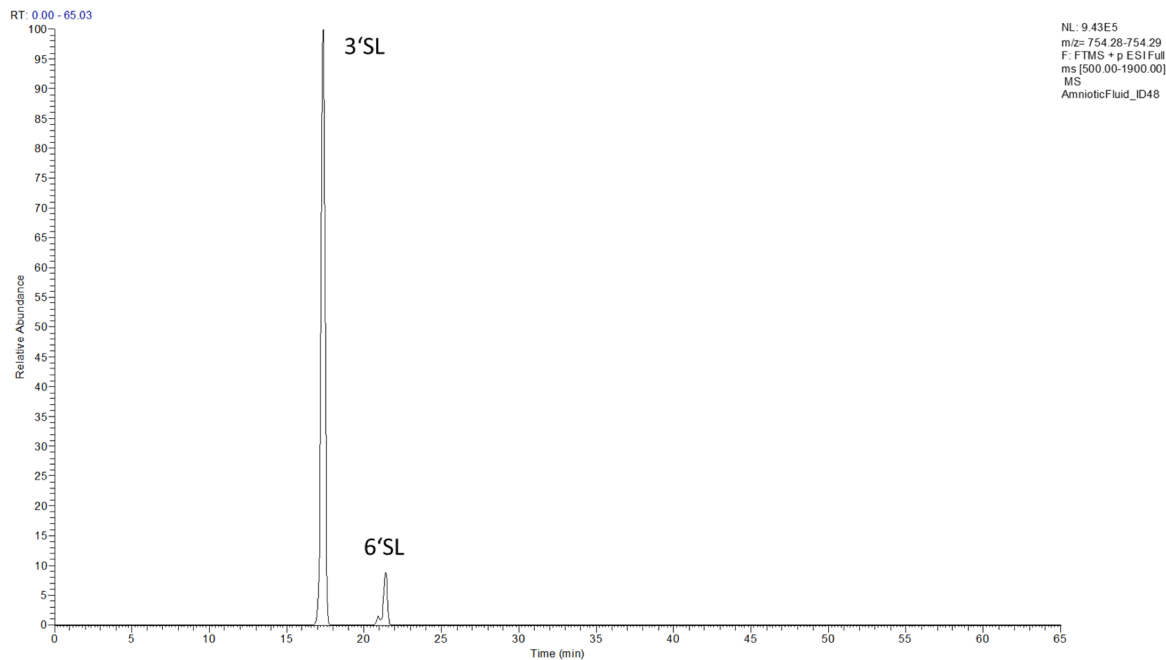

**B**

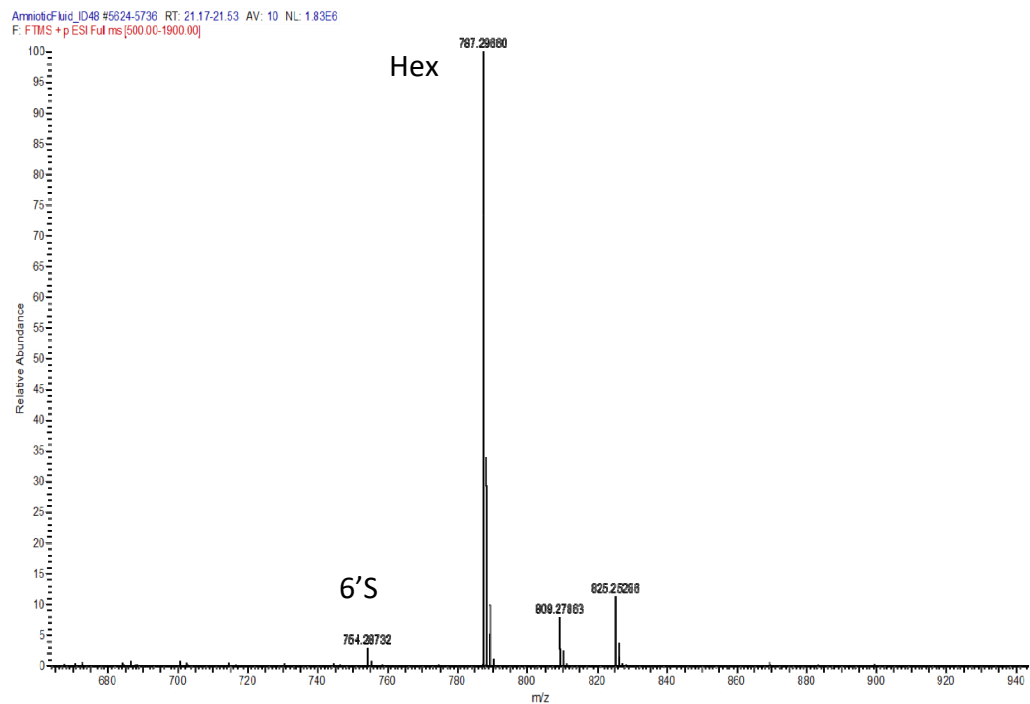

**Supplementary Figure S2.** Detection of an additional oligosaccharide co-eluting with 6'SL. (A) Mass chromatogram of sialyllactose isolated from amniotic fluid sample (36 wk of gestation) acquired by LC-MS/MS in multiple reaction monitoring mode is showing the mass transition 754/301 for 3'-sialyllactose (3'-SL) and 6'SL. (B) Mass spectrum of the single peak at retention time of 6'SL shows a relatively higher signal with the mass of 787.29 corresponding to the 2AB H<sup>+</sup> adduct of a tetrasaccharide containing 4 hexoses (Hex<sub>4</sub>).
